# Supplementary material
Source: PubMed Central journal article supplement (PMC3824116)
Supplement: mmc1.pdf [file mmc1.pdf]

The American Journal of Human Genetics, Volume 93

**Supplemental Data**

**Association of Parkinson Disease with Structural  
and Regulatory Variants in the *HLA* Region**

**William T. Wissemann, Erin M. Hill-Burns, Cyrus P. Zabetian, Stewart A. Factor, Nikolaos Patsopoulos,  
Bryan Hoglund, Cherie Holcomb, Ryan J. Donahue, Glenys Thomson, Henry Erlich, and Haydeh Payami**



|                   |     |       |             |       |       |      |       |       |                   |                   |       |       |       |       |       |       |       |       |
|-------------------|-----|-------|-------------|-------|-------|------|-------|-------|-------------------|-------------------|-------|-------|-------|-------|-------|-------|-------|-------|
| <i>DRB1*14:04</i> | 0   | 0.000 | 15          | NC    | 0.981 | 0    | NC    | NC    | <i>DPB1*01:01</i> | 33                | 0.041 | 33    | 1.000 | 1.000 | 63    | 1.000 | 0.961 |       |
| <i>DRB1*15:01</i> | 108 | 0.136 | 112         | 0.991 | 0.993 | 11:0 | 1.000 | 0.997 | <i>DPB1*02:01</i> | 98                | 0.123 | 102   | 1.000 | 0.994 | 91    | 0.867 | 0.991 |       |
| <i>DRB1*15:02</i> | 6   | 0.008 | 5           | 0.833 | 1.000 | 5    | 0.833 | 1.000 | <i>DPB1*02:02</i> | 5                 | 0.006 | 5     | 1.000 | 1.000 | 3     | 0.000 | 0.996 |       |
| <i>DRB1*15:03</i> | 1   | 0.001 | 2           | 1.000 | 0.999 | 0    | 0.000 | 1.000 | <i>DPB1*03:01</i> | 71                | 0.089 | 70    | 0.958 | 0.997 | 79    | 0.958 | 0.985 |       |
| <i>DRB1*16:01</i> | 5   | 0.006 | 6           | 1.000 | 0.999 | 7    | 1.000 | 0.997 | <i>DPB1*04:01</i> | 370               | 0.465 | 371   | 0.984 | 0.984 | 382   | 0.989 | 0.962 |       |
| <i>DRB1*16:04</i> | 1   | 0.001 | 0           | 0.000 | 1.000 | 0    | 0.000 | 1.000 | <i>DPB1*04:02</i> | 95                | 0.119 | 95    | 0.989 | 0.999 | 104   | 1.000 | 0.987 |       |
| <i>DRB1*NA</i>    | 1   | 0.001 | 0           | -     | -     | 0    | -     | -     | <i>DPB1*05:01</i> | 13                | 0.016 | 13    | 1.000 | 1.000 | 5     | 0.231 | 0.997 |       |
|                   |     |       |             |       |       |      |       |       | <i>DPB1*05:02</i> | 0                 | 0.000 | 0     | NC    | NC    | 9     | NC    | 0.989 |       |
| <i>DRB3*00</i>    | 503 | 0.632 | Not imputed |       |       |      | 513   | 0.990 | 0.949             | <i>DPB1*06:01</i> | 10    | 0.013 | 12    | 0.900 | 0.996 | 0     | 0.000 | 1.000 |
| <i>DRB3*01</i>    | 109 | 0.137 |             |       |       |      | 106   | 0.936 | 0.994             | <i>DPB1*09:01</i> | 3     | 0.004 | 1     | 0.333 | 1.000 | 9     | 0.000 | 0.989 |
| <i>DRB3*02</i>    | 147 | 0.185 |             |       |       |      | 144   | 0.966 | 0.997             | <i>DPB1*10:01</i> | 15    | 0.019 | 14    | 0.933 | 1.000 | 7     | 0.000 | 0.991 |
| <i>DRB3*03</i>    | 37  | 0.046 |             |       |       |      | 33    | 0.892 | 1.000             | <i>DPB1*11:01</i> | 17    | 0.021 | 17    | 1.000 | 1.000 | 18    | 1.000 | 0.999 |
|                   |     |       |             |       |       |      |       |       |                   | <i>DPB1*13:01</i> | 18    | 0.023 | 18    | 1.000 | 1.000 | 19    | 1.000 | 0.999 |
| <i>DRB4*00</i>    | 524 | 0.658 |             |       |       |      | 526   | 0.992 | 0.978             | <i>DPB1*14:01</i> | 11    | 0.014 | 14    | 1.000 | 0.996 | 0     | 0.000 | 1.000 |
| <i>DRB4*01</i>    | 272 | 0.342 |             |       |       |      | 270   | 0.978 | 0.992             | <i>DPB1*15:01</i> | 6     | 0.008 | 6     | 1.000 | 1.000 | 0     | 0.000 | 1.000 |
|                   |     |       |             |       |       |      |       |       |                   | <i>DPB1*16:01</i> | 5     | 0.006 | 5     | 1.000 | 1.000 | 0     | 0.000 | 1.000 |
| <i>DRB5*00</i>    | 675 | 0.848 |             |       |       |      | 675   | 1.000 | 1.000             | <i>DPB1*17:01</i> | 12    | 0.015 | 11    | 0.917 | 1.000 | 6     | 0.333 | 0.997 |
| <i>DRB5*01</i>    | 115 | 0.144 |             |       |       |      | 115   | 1.000 | 1.000             | <i>DPB1*18:01</i> | 1     | 0.001 | 1     | 1.000 | 1.000 | 0     | 0.000 | 1.000 |
| <i>DRB5*02</i>    | 6   | 0.008 |             |       |       |      | 6     | 1.000 | 1.000             | <i>DPB1*19:01</i> | 5     | 0.006 | 5     | 1.000 | 1.000 | 0     | 0.000 | 1.000 |
|                   |     |       |             |       |       |      |       |       |                   | <i>DPB1*20:01</i> | 1     | 0.001 | 0     | 0.000 | 1.000 | 0     | 0.000 | 1.000 |
|                   |     |       |             |       |       |      |       |       |                   | <i>DPB1*23:01</i> | 6     | 0.008 | 2     | 0.000 | 0.997 | 1     | 0.000 | 0.999 |
|                   |     |       |             |       |       |      |       |       |                   | <i>DPB1*35:01</i> | 1     | 0.001 | 1     | 0.000 | 0.999 | 0     | 0.000 | 1.000 |

Two imputation algorithms were applied to the exact same GWAS dataset for a side-by-side comparison of two methods. A subset of data was *HLA* typed by deep sequencing allowing comparisons to the gold standard. Allele-specific sensitivity and specificity of two imputation algorithms as compared to next generation sequencing are shown for class II loci.

SNP2HLA<sup>12</sup> and HLA\*IMP<sup>13</sup>: two imputation algorithms. N: number of alleles called by each technique (total across each locus = 796). Those called by imputation include true positives as well as any false positives. Even if both NGS and imputation show the same N, they may or not be perfect matches. SS: sensitivity is the ratio of true positives (N chromosomes called correctly by imputation as having the allele) to the number called by NGS. SP: specificity is the ratio of true negatives (N called correctly as allele absent by imputation) to the number of chromosomes called by NGS as not having the allele. NC: not calculated. UD: undetermined (*DQA1\*05:01* splits into 05:01 and 05:05).

HLA\*IMP picked it up and since NGS did not, SS and SP of HLA\*IMP is undetermined). NA: Not called by NGS. Each chromosome that had a no-call by NGS was tracked to the person, matched to the allele that was called by imputation, and was removed from SS and SP calculation.

Table S2. Association of PD with *HLA* haplotypes

|                                                                 | Frequency |      | NGRC |      | Replication |      | Meta Analysis |      |
|-----------------------------------------------------------------|-----------|------|------|------|-------------|------|---------------|------|
|                                                                 | In NGRC   |      | OR   | P    | OR          | P    | OR            | P    |
|                                                                 | PD        | Cont |      |      |             |      |               |      |
| <b>Class I haplotypes</b>                                       |           |      |      |      |             |      |               |      |
| <i>B*07:02_C*07:02</i>                                          | 0.15      | 0.13 | 1.21 | 6E-3 | 1.29        | 0.02 | 1.23          | 3E-4 |
| <i>B*40:01_C*03:04</i>                                          | 0.05      | 0.06 | 0.79 | 0.03 | 0.71        | 0.03 | 0.76          | 2E-3 |
| <b>Class II haplotypes</b>                                      |           |      |      |      |             |      |               |      |
| <i>DRB5*01_DRB1*15:01_DQA1*01:02_DQB1*06:02</i>                 | 0.15      | 0.13 | 1.26 | 7E-4 | 1.27        | 0.02 | 1.27          | 5E-5 |
| <i>DRB4*01_DRB1*04:04_DQA1*03:01_DQB1*03:02</i>                 | 0.03      | 0.05 | 0.64 | 7E-4 | 0.65        | 0.02 | 0.64          | 4E-5 |
| <b>Extended haplotypes</b>                                      |           |      |      |      |             |      |               |      |
| <i>B*07:02_C*07:02_DRB5*01_DRB1*15:01_DQA1*01:02_DQB1*06:02</i> | 0.09      | 0.07 | 1.29 | 3E-3 | 1.38        | 0.02 | 1.32          | 2E-4 |
| <i>B*40:01_C*03:04_DRB4*01_DRB1*04:04_DQA1*03:01_DQB1*03:02</i> | 0.01      | 0.02 | 0.60 | 0.02 | 0.52        | 0.06 | 0.58          | 3E-3 |

Haplotypes were constructed with the 12 alleles that were associated with PD (Table 1).

Tests were conducted under additive model and adjusted for principal components 1 and 2.

P-values are two sided (including replication) uncorrected for multiple testing.

**Table S3. Conditional analysis testing interdependence of alleles that form the “protective” haplotype** (meta-analysis of NGRC and replication)

| test              | conditioned on    | P     | OR   |
|-------------------|-------------------|-------|------|
| <i>B*40:01</i>    | unconditioned     | 2E-03 | 0.76 |
|                   | <i>C*03:04</i>    | 0.36  | 1.15 |
|                   | <i>DQA1*03:01</i> | 0.01  | 0.79 |
|                   | <i>DQB1*03:02</i> | 0.01  | 0.80 |
|                   | <i>DRB1*04:04</i> | 0.03  | 0.82 |
|                   | <i>DRB4*01</i>    | 5E-03 | 0.78 |
| <i>C*03:04</i>    | <i>B*40:01</i>    | 1E-03 | 0.66 |
|                   | unconditioned     | 8E-06 | 0.72 |
|                   | <i>DQA1*03:01</i> | 3E-04 | 0.76 |
|                   | <i>DQB1*03:02</i> | 6E-04 | 0.77 |
|                   | <i>DRB1*04:04</i> | 2E-04 | 0.75 |
|                   | <i>DRB4*01</i>    | 7E-05 | 0.74 |
| <i>DQA1*03:01</i> | <i>B*40:01</i>    | 4E-06 | 0.78 |
|                   | <i>C*03:04</i>    | 3E-05 | 0.79 |
|                   | unconditioned     | 1E-06 | 0.77 |
|                   | <i>DQB1*03:02</i> | 0.02  | 0.83 |
|                   | <i>DRB1*04:04</i> | 7E-04 | 0.81 |
|                   | <i>DRB4*01</i>    | 4E-03 | 0.81 |
| <i>DQB1*03:02</i> | <i>B*40:01</i>    | 5E-05 | 0.76 |
|                   | <i>C*03:04</i>    | 5E-04 | 0.79 |
|                   | <i>DQA1*03:01</i> | 0.20  | 0.88 |
|                   | unconditioned     | 7E-06 | 0.74 |
|                   | <i>DRB1*04:04</i> | 0.01  | 0.81 |
|                   | <i>DRB4*01</i>    | 0.01  | 0.80 |
| <i>DRB1*04:04</i> | <i>B*40:01</i>    | 5E-04 | 0.68 |
|                   | <i>C*03:04</i>    | 9E-04 | 0.70 |
|                   | <i>DQA1*03:01</i> | 0.03  | 0.77 |
|                   | <i>DQB1*03:02</i> | 0.06  | 0.79 |
|                   | unconditioned     | 4E-05 | 0.65 |
|                   | <i>DRB4*01</i>    | 3E-03 | 0.72 |
| <i>DRB4*01</i>    | <i>B*40:01</i>    | 1E-04 | 0.84 |
|                   | <i>C*03:04</i>    | 4E-04 | 0.85 |
|                   | <i>DQA1*03:01</i> | 0.34  | 0.94 |
|                   | <i>DQB1*03:02</i> | 0.05  | 0.90 |
|                   | <i>DRB1*04:04</i> | 4E-03 | 0.87 |
|                   | unconditioned     | 4E-05 | 0.83 |

Grey row: the allele in the left-hand column lost significance when conditioned on the allele in the second column.

*C\*03:04*, *DQA1\*03:01* and *DRB1\*04:04* had seemingly independent signals for association with PD

**Table S4. Conditional analysis testing interdependence of PD-associated SNPs (Meta analysis of NGRC and replication)**

| Test                  | conditioned on   | P     | OR   |
|-----------------------|------------------|-------|------|
| <b>rs2395163</b>      | unconditioned    | 2E-07 | 0.77 |
|                       | rs3129882        | 5E-03 | 0.86 |
|                       | rs41269955       | 4E-03 | 0.80 |
|                       | rs660895         | 5E-04 | 0.78 |
|                       | <b>rs9268515</b> | 0.13  | 0.88 |
| <b>rs3129882</b>      | rs2395163        | 2E-06 | 1.23 |
|                       | unconditioned    | 9E-11 | 1.30 |
|                       | rs41269955       | 4E-08 | 1.27 |
|                       | rs660895         | 1E-08 | 1.27 |
|                       | rs9268515        | 7E-07 | 1.23 |
| rs41269955/rs77539933 | rs2395163        | 0.44  | 0.94 |
|                       | rs3129882        | 0.02  | 0.88 |
|                       | unconditioned    | 2E-05 | 0.81 |
|                       | rs660895         | 0.03  | 0.83 |
|                       | rs9268515        | 0.24  | 0.92 |
| rs660895              | rs2395163        | 0.87  | 0.99 |
|                       | rs3129882        | 0.02  | 0.88 |
|                       | rs41269955       | 0.66  | 0.96 |
|                       | unconditioned    | 9E-05 | 0.82 |
|                       | rs9268515        | 0.92  | 0.99 |
| <b>rs9268515</b>      | <b>rs2395163</b> | 0.04  | 0.83 |
|                       | rs3129882        | 3E-04 | 0.81 |
|                       | rs41269955       | 2E-03 | 0.79 |
|                       | rs660895         | 2E-04 | 0.75 |
|                       | unconditioned    | 8E-08 | 0.75 |

Grey row: the SNP in the left-hand column lost significance when conditioned on the SNP in the second column.

rs2395163 and rs9268515 tag each other tightly.

rs3129882 is independent of all other SNPs.

**Table S5. Association of SNPs with PD conditioned on classical variants** (Extended version of Table 3 of the main manuscript)

|                                                                   | NGRC      |           |                         |          |           |           |           |                         | Replication |           |           |           |                           |          |           |      | Meta Analysis |      |      |      |      |       |      |      |      |      |      |      |      |      |
|-------------------------------------------------------------------|-----------|-----------|-------------------------|----------|-----------|-----------|-----------|-------------------------|-------------|-----------|-----------|-----------|---------------------------|----------|-----------|------|---------------|------|------|------|------|-------|------|------|------|------|------|------|------|------|
|                                                                   | rs3129882 | rs9268515 | rs41269955 <sup>a</sup> | rs660895 | rs2395163 | rs3129882 | rs9268515 | rs77539933 <sup>a</sup> | rs660895    | rs2395163 | rs3129882 | rs9268515 | rs41269955/<br>rs77539933 | rs660895 | rs2395163 | OR   | P             | OR   | P    | OR   | P    | OR    | P    | OR   | P    | OR   | P    | OR   | P    |      |
| <b>Not conditioned</b>                                            | 1.35      | 1E-9      | 0.74                    | 5E-6     | 0.80      | 4E-4      | 0.83      | 2E-3                    | 0.77        | 2E-5      | 1.20      | 0.01      | 0.75                      | 5E-3     | 0.82      | 0.02 | 0.81          | 0.02 | 0.78 | 3E-3 | 1.30 | 9E-11 | 0.75 | 8E-8 | 0.81 | 2E-5 | 0.82 | 9E-5 | 0.77 | 2E-7 |
| <b>SNP association with PD conditioned on HLA alleles</b>         |           |           |                         |          |           |           |           |                         |             |           |           |           |                           |          |           |      |               |      |      |      |      |       |      |      |      |      |      |      |      |      |
| <i>B*07:02</i>                                                    | 1.33      | 2E-8      | 0.75                    | 1E-5     | 0.80      | 8E-4      | 0.84      | 4E-3                    | 0.78        | 5E-5      | 1.16      | 0.04      | 0.77                      | 8E-3     | 0.84      | 0.04 | 0.82          | 0.02 | 0.79 | 6E-3 | 1.27 | 6E-9  | 0.76 | 3E-7 | 0.82 | 8E-5 | 0.83 | 2E-4 | 0.78 | 9E-7 |
| <i>B*40:01</i>                                                    | 1.34      | 2E-9      | 0.75                    | 2E-5     | 0.81      | 1E-3      | 0.84      | 5E-3                    | 0.78        | 4E-5      | 1.19      | 0.01      | 0.77                      | 9E-3     | 0.83      | 0.02 | 0.82          | 0.03 | 0.79 | 6E-3 | 1.29 | 3E-10 | 0.76 | 5E-7 | 0.82 | 6E-5 | 0.83 | 4E-4 | 0.78 | 8E-7 |
| <i>C*03:04</i>                                                    | 1.33      | 6E-9      | 0.76                    | 5E-5     | 0.82      | 2E-3      | 0.85      | 0.01                    | 0.79        | 1E-4      | 1.17      | 0.02      | 0.80                      | 0.03     | 0.84      | 0.03 | 0.84          | 0.06 | 0.81 | 0.01 | 1.28 | 1E-9  | 0.78 | 5E-6 | 0.83 | 2E-4 | 0.85 | 2E-3 | 0.80 | 5E-6 |
| <i>C*07:02</i>                                                    | 1.32      | 3E-8      | 0.75                    | 2E-5     | 0.81      | 9E-4      | 0.84      | 4E-3                    | 0.78        | 6E-5      | 1.17      | 0.03      | 0.76                      | 7E-3     | 0.84      | 0.03 | 0.81          | 0.02 | 0.79 | 5E-3 | 1.27 | 7E-9  | 0.76 | 4E-7 | 0.82 | 8E-5 | 0.83 | 2E-4 | 0.78 | 1E-6 |
| <i>DRB1*04:04</i>                                                 | 1.32      | 1E-8      | 0.78                    | 4E-4     | 0.85      | 0.03      | 0.89      | 0.07                    | 0.81        | 1E-3      | 1.18      | 0.02      | 0.81                      | 0.05     | 0.87      | 0.09 | 0.85          | 0.1  | 0.81 | 0.02 | 1.27 | 2E-9  | 0.79 | 6E-5 | 0.86 | 5E-3 | 0.87 | 0.02 | 0.81 | 5E-5 |
| <i>DRB1*15:01</i>                                                 | 1.33      | 2E-7      | 0.77                    | 8E-5     | 0.83      | 4E-3      | 0.86      | 2E-2                    | 0.80        | 3E-4      | 1.15      | 0.08      | 0.78                      | 0.01     | 0.85      | 0.05 | 0.83          | 0.04 | 0.80 | 0.01 | 1.27 | 2E-7  | 0.77 | 3E-6 | 0.83 | 5E-4 | 0.85 | 2E-3 | 0.80 | 8E-6 |
| <i>DRB4*01</i>                                                    | 1.34      | 9E-8      | 0.76                    | 4E-4     | 0.82      | 0.04      | 0.88      | 0.1                     | 0.76        | 2E-3      | 1.12      | 0.1       | 0.83                      | 0.1      | 1.14      | 0.4  | 0.91          | 0.4  | 0.86 | 0.2  | 1.26 | 2E-7  | 0.78 | 1E-4 | 0.89 | 0.2  | 0.89 | 0.07 | 0.79 | 1E-3 |
| <i>DRB5*01</i>                                                    | 1.33      | 3E-7      | 0.77                    | 9E-5     | 0.83      | 4E-3      | 0.86      | 0.02                    | 0.80        | 3E-4      | 1.15      | 0.08      | 0.78                      | 0.01     | 0.85      | 0.06 | 0.83          | 0.04 | 0.80 | 0.01 | 1.27 | 2E-7  | 0.77 | 3E-6 | 0.83 | 5E-4 | 0.85 | 2E-3 | 0.80 | 8E-6 |
| <i>DQA1*01:02</i>                                                 | 1.35      | 1E-8      | 0.76                    | 4E-5     | 0.82      | 2E-3      | 0.85      | 0.01                    | 0.78        | 1E-4      | 1.15      | 0.06      | 0.78                      | 0.01     | 0.85      | 0.06 | 0.84          | 0.05 | 0.80 | 0.01 | 1.28 | 1E-8  | 0.76 | 2E-6 | 0.83 | 4E-4 | 0.84 | 1E-3 | 0.79 | 5E-6 |
| <i>DQA1*03:01</i>                                                 | 1.30      | 3E-7      | 0.78                    | 0.02     | 1.04      | 0.8       | 1.17      | 0.3                     | 0.82        | 0.04      | 1.13      | 0.09      | 0.85                      | 0.3      | 0.92      | 0.5  | 1.16          | 0.5  | 0.88 | 0.3  | 1.24 | 2E-7  | 0.80 | 0.01 | 0.95 | 0.6  | 1.17 | 0.2  | 0.84 | 0.03 |
| <i>DQB1*03:02</i>                                                 | 1.31      | 8E-8      | 0.79                    | 2E-3     | 0.88      | 0.2       | 0.93      | 0.4                     | 0.82        | 7E-3      | 1.15      | 0.05      | 0.83                      | 0.1      | 0.89      | 0.2  | 0.91          | 0.4  | 0.84 | 0.1  | 1.26 | 3E-8  | 0.80 | 6E-4 | 0.88 | 0.06 | 0.92 | 0.2  | 0.82 | 2E-3 |
| <i>DQB1*06:02</i>                                                 | 1.33      | 3E-7      | 0.77                    | 8E-5     | 0.83      | 4E-3      | 0.86      | 0.02                    | 0.80        | 3E-4      | 1.15      | 0.08      | 0.78                      | 0.01     | 0.85      | 0.05 | 0.83          | 0.04 | 0.80 | 0.01 | 1.26 | 2E-7  | 0.77 | 3E-6 | 0.83 | 5E-4 | 0.85 | 2E-3 | 0.80 | 8E-6 |
| <b>SNP association with PD conditioned on class I haplotypes</b>  |           |           |                         |          |           |           |           |                         |             |           |           |           |                           |          |           |      |               |      |      |      |      |       |      |      |      |      |      |      |      |      |
| <i>B*07:02_C*07:02</i>                                            | 1.33      | 2E-8      | 0.75                    | 1E-5     | 0.81      | 8E-4      | 0.84      | 4E-3                    | 0.78        | 5E-5      | 1.16      | 0.03      | 0.77                      | 8E-3     | 0.84      | 0.03 | 0.81          | 0.02 | 0.79 | 6E-3 | 1.27 | 6E-9  | 0.76 | 3E-7 | 0.82 | 8E-5 | 0.83 | 2E-4 | 0.78 | 9E-7 |
| <i>B*40:01_C*03:04</i>                                            | 1.34      | 2E-9      | 0.75                    | 2E-5     | 0.81      | 9E-4      | 0.84      | 5E-3                    | 0.78        | 4E-5      | 1.19      | 0.01      | 0.77                      | 9E-3     | 0.83      | 0.02 | 0.82          | 0.03 | 0.79 | 6E-3 | 1.29 | 3E-10 | 0.76 | 5E-7 | 0.82 | 6E-5 | 0.83 | 3E-4 | 0.78 | 8E-7 |
| <b>SNP association with PD conditioned on class II haplotypes</b> |           |           |                         |          |           |           |           |                         |             |           |           |           |                           |          |           |      |               |      |      |      |      |       |      |      |      |      |      |      |      |      |
| <i>DRB5*01_DRB1*15:01_DQA1*01:02_DQB1*06:02</i>                   | 1.33      | 3E-7      | 0.77                    | 8E-5     | 0.83      | 4E-3      | 0.86      | 0.02                    | 0.80        | 3E-4      | 1.15      | 0.08      | 0.78                      | 0.01     | 0.85      | 0.05 | 0.83          | 0.04 | 0.80 | 0.01 | 1.27 | 2E-7  | 0.77 | 3E-6 | 0.83 | 5E-4 | 0.85 | 2E-3 | 0.80 | 8E-6 |
| <i>DRB4*01_DRB1*04:04_DQA1*03:01_DQB1*03:02</i>                   | 1.32      | 1E-8      | 0.78                    | 4E-4     | 0.85      | 2E-2      | 0.88      | 6E-2                    | 0.81        | 9E-4      | 1.18      | 0.02      | 0.82                      | 0.06     | 0.87      | 0.1  | 0.86          | 0.1  | 0.81 | 0.02 | 1.27 | 2E-9  | 0.79 | 6E-5 | 0.86 | 5E-3 | 0.87 | 0.02 | 0.81 | 5E-5 |
| <b>SNP association with PD conditioned on extended haplotypes</b> |           |           |                         |          |           |           |           |                         |             |           |           |           |                           |          |           |      |               |      |      |      |      |       |      |      |      |      |      |      |      |      |
| <i>B*07:02_C*07:02_DRB5*01_DRB1*15:01_DQA1*01:02_DQB1*06:02</i>   | 1.33      | 5E-8      | 0.76                    | 4E-5     | 0.82      | 2E-3      | 0.85      | 8E-3                    | 0.79        | 1E-4      | 1.15      | 0.06      | 0.77                      | 9E-3     | 0.85      | 0.04 | 0.82          | 0.03 | 0.79 | 7E-3 | 1.27 | 3E-8  | 0.76 | 1E-6 | 0.83 | 2E-4 | 0.84 | 6E-4 | 0.79 | 3E-6 |
| <i>B*40:01_C*03:04_DRB4*01_DRB1*04:04_DQA1*03:01_DQB1*03:02</i>   | 1.34      | 4E-9      | 0.76                    | 5E-5     | 0.82      | 3E-3      | 0.85      | 0.01                    | 0.79        | 1E-4      | 1.19      | 0.01      | 0.78                      | 0.02     | 0.84      | 0.04 | 0.83          | 0.04 | 0.80 | 0.01 | 1.28 | 5E-10 | 0.77 | 3E-6 | 0.83 | 3E-4 | 0.84 | 1E-3 | 0.79 | 3E-6 |

<sup>a</sup> Originally reported SNP could not be generated. Proxies that imputed best in NGRC (rs41269955) and replication (rs77539933) were in moderate LD with original SNP ( $r^2=0.75$ ) and in complete LD with each other ( $D'=1$ ,  $r^2=1$ ). P values shown are two sided for all analyses (including replication) and not corrected for multiple testing. Tests were adjusted for principal components 1 and 2.

Table S6. Stratified analysis.

| A                                                                                                                                                                                    | NGRC       |     |     |               |     |     | Replication |      |            |     |     |               | Meta Analysis |     |      |      |      |       |
|--------------------------------------------------------------------------------------------------------------------------------------------------------------------------------------|------------|-----|-----|---------------|-----|-----|-------------|------|------------|-----|-----|---------------|---------------|-----|------|------|------|-------|
|                                                                                                                                                                                      | N in Cases |     |     | N in Controls |     |     | OR          | P    | N in Cases |     |     | N in Controls |               |     | OR   | P    | OR   | P     |
|                                                                                                                                                                                      | 0          | 1   | 2   | 0             | 1   | 2   |             |      | 0          | 1   | 2   | 0             | 1             | 2   |      |      |      |       |
| Association of rs3129882_G vs. A allele with PD stratified by presence or absence of <i>B*07:02_C*07:02_DRB5*01_DRB1*15:01_DQA1*01:02_DQB1*06:02</i> haplotype                       |            |     |     |               |     |     |             |      |            |     |     |               |               |     |      |      |      |       |
| Irrespective of haplotype                                                                                                                                                            | 434        | 790 | 341 | 726           | 948 | 310 | 1.35        | 1E-9 | 252        | 421 | 170 | 308           | 401           | 146 | 1.20 | 0.01 | 1.30 | 9E-11 |
| Haplotype absent                                                                                                                                                                     | 434        | 638 | 224 | 726           | 772 | 204 | 1.33        | 1E-7 | 252        | 345 | 116 | 308           | 342           | 104 | 1.16 | 0.05 | 1.27 | 5E-8  |
| Haplotype present                                                                                                                                                                    | 0          | 152 | 117 | 0             | 176 | 106 | 1.28        | 0.2  | 0          | 76  | 54  | 0             | 59            | 42  | 1.05 | 0.9  | 1.21 | 0.2   |
| Test of association of <i>B*07:02_C*07:02_DRB5*01_DRB1*15:01_DQA1*01:02_DQB1*06:02</i> haplotype with PD stratified by SNP genotype                                                  |            |     |     |               |     |     |             |      |            |     |     |               |               |     |      |      |      |       |
| Irrespective of SNP                                                                                                                                                                  | 1296       | 257 | 12  | 1704          | 271 | 11  | 1.29        | 3E-3 | 713        | 124 | 6   | 755           | 97            | 4   | 1.38 | 0.02 | 1.32 | 2E-4  |
| rs3129882_AA                                                                                                                                                                         | 434        | 0   | 0   | 726           | 0   | 0   | -           | -    | 252        | 0   | 0   | 308           | 0             | 0   | -    | -    | -    | -     |
| rs3129882_AG                                                                                                                                                                         | 638        | 152 | 0   | 772           | 176 | 0   | 1.12        | 0.4  | 345        | 76  | 0   | 342           | 59            | 0   | 1.25 | 0.3  | 1.15 | 0.2   |
| rs3129882_GG                                                                                                                                                                         | 224        | 105 | 12  | 204           | 95  | 11  | 1.06        | 0.7  | 116        | 48  | 6   | 104           | 38            | 4   | 1.22 | 0.4  | 1.11 | 0.4   |
| Test of association of <i>B*40:01_C*03:04_DRB4*01_DRB1*04:04_DQA1*03:01_DQB1*03:02</i> haplotype with PD stratified by SNP genotype                                                  |            |     |     |               |     |     |             |      |            |     |     |               |               |     |      |      |      |       |
| Irrespective of SNP                                                                                                                                                                  | 1531       | 34  | 0   | 1914          | 71  | 1   | 0.60        | 0.02 | 831        | 12  | 0   | 832           | 24            | 0   | 0.52 | 0.06 | 0.58 | 3E-03 |
| rs9268515_GG                                                                                                                                                                         | 1118       | 3   | 0   | 1266          | 2   | 0   | -           | -    | 612        | 2   | 0   | 571           | 0             | 0   | -    | -    | -    | -     |
| rs9268515_GC                                                                                                                                                                         | 377        | 25  | 0   | 589           | 57  | 0   | 0.69        | 0.1  | 171        | 6   | 0   | 201           | 17            | 0   | 0.39 | 0.06 | 0.61 | 0.03  |
| rs9268515_CC                                                                                                                                                                         | 29         | 6   | 0   | 52            | 12  | 1   | 0.82        | 0.7  | 12         | 3   | 0   | 20            | 7             | 0   | 0.77 | 0.75 | 0.81 | 0.6   |
| rs77539933_CC/rs41269955_GG                                                                                                                                                          | 1086       | 0   | 0   | 1269          | 0   | 0   | -           | -    | 325        | 0   | 0   | 273           | 0             | 0   | -    | -    | -    | -     |
| rs77539933_CT/rs41269955_GA                                                                                                                                                          | 415        | 30  | 0   | 584           | 61  | 0   | 0.70        | 0.1  | 243        | 7   | 0   | 278           | 12            | 0   | 0.69 | 0.5  | 0.70 | 0.09  |
| rs77539933_TT/rs41269955_AA                                                                                                                                                          | 27         | 4   | 0   | 54            | 10  | 1   | 0.75        | 0.6  | 74         | 3   | 0   | 76            | 9             | 0   | 0.37 | 0.1  | 0.55 | 0.2   |
| rs660895_AA                                                                                                                                                                          | 1046       | 0   | 0   | 1230          | 0   | 0   | -           | -    | 593        | 0   | 0   | 550           | 0             | 0   | -    | -    | -    | -     |
| rs660895_AG                                                                                                                                                                          | 447        | 29  | 0   | 619           | 59  | 0   | 0.69        | 0.1  | 212        | 10  | 0   | 256           | 16            | 0   | 0.77 | 0.5  | 0.71 | 0.09  |
| rs660895_GG                                                                                                                                                                          | 38         | 5   | 0   | 65            | 12  | 1   | 0.63        | 0.4  | 26         | 2   | 0   | 26            | 8             | 0   | 0.29 | 0.1  | 0.50 | 0.1   |
| rs2395163_TT                                                                                                                                                                         | 1030       | 2   | 0   | 1162          | 2   | 0   | -           | -    | 562        | 2   | 0   | 520           | 0             | 0   | -    | -    | -    | -     |
| rs2395163_TC                                                                                                                                                                         | 455        | 24  | 0   | 681           | 58  | 0   | 0.65        | 0.1  | 243        | 8   | 0   | 275           | 16            | 0   | 0.59 | 0.2  | 0.63 | 0.04  |
| rs2395163_CC                                                                                                                                                                         | 45         | 8   | 0   | 71            | 11  | 1   | 1.01        | 1.0  | 26         | 2   | 0   | 37            | 8             | 0   | 0.42 | 0.3  | 0.82 | 0.6   |
| Association of rs9268515_G vs. C allele with PD stratified by presence or absence of <i>B*40:01_C*03:04_DRB4*01_DRB1*04:04_DQA1*03:01_DQB1*03:02</i> haplotype                       |            |     |     |               |     |     |             |      |            |     |     |               |               |     |      |      |      |       |
| Irrespective of haplotype                                                                                                                                                            | 1121       | 402 | 35  | 1268          | 646 | 65  | 0.74        | 5E-6 | 614        | 177 | 15  | 571           | 218           | 27  | 0.75 | 5E-3 | 0.75 | 8E-8  |
| Haplotype absent                                                                                                                                                                     | 1118       | 377 | 29  | 1266          | 589 | 52  | 0.76        | 6E-5 | 612        | 171 | 12  | 571           | 201           | 20  | 0.79 | 0.03 | 0.77 | 4E-6  |
| Haplotype present                                                                                                                                                                    | 3          | 25  | 6   | 2             | 57  | 13  | 0.74        | 0.5  | 2          | 6   | 3   | 0             | 17            | 7   | 0.34 | 0.2  | 0.62 | 0.3   |
| Association of rs41269955_G vs. A / rs77539933_C vs. T allele with PD stratified by presence or absence of <i>B*40:01_C*03:04_DRB4*01_DRB1*04:04_DQA1*03:01_DQB1*03:02</i> haplotype |            |     |     |               |     |     |             |      |            |     |     |               |               |     |      |      |      |       |
| Irrespective of haplotype                                                                                                                                                            | 1086       | 445 | 31  | 1269          | 645 | 65  | 0.80        | 4E-4 | 325        | 250 | 77  | 273           | 290           | 85  | 0.82 | 0.02 | 0.81 | 2E-5  |
| Haplotype absent                                                                                                                                                                     | 1086       | 415 | 27  | 1269          | 584 | 54  | 0.82        | 3E-3 | 325        | 243 | 74  | 273           | 278           | 76  | 0.84 | 0.04 | 0.83 | 3E-4  |
| Haplotype present                                                                                                                                                                    | 0          | 30  | 4   | 0             | 61  | 11  | 0.71        | 0.6  | 0          | 7   | 3   | 0             | 12            | 9   | 0.63 | 0.6  | 0.68 | 0.4   |
| Association of rs660895_A vs. G allele with PD stratified by presence or absence of <i>B*40:01_C*03:04_DRB4*01_DRB1*04:04_DQA1*03:01_DQB1*03:02</i> haplotype                        |            |     |     |               |     |     |             |      |            |     |     |               |               |     |      |      |      |       |
| Irrespective of haplotype                                                                                                                                                            | 1046       | 476 | 43  | 1230          | 678 | 78  | 0.83        | 2E-3 | 593        | 222 | 28  | 550           | 272           | 34  | 0.81 | 0.02 | 0.82 | 9E-5  |
| Haplotype absent                                                                                                                                                                     | 1046       | 447 | 38  | 1230          | 619 | 65  | 0.85        | 0.01 | 593        | 212 | 26  | 550           | 256           | 26  | 0.84 | 0.05 | 0.84 | 1E-3  |
| Haplotype present                                                                                                                                                                    | 0          | 29  | 5   | 0             | 59  | 13  | 0.75        | 0.6  | 0          | 10  | 2   | 0             | 16            | 8   | 0.48 | 0.4  | 0.66 | 0.4   |
| Association of rs2395163_T vs. C allele with PD stratified by presence or absence of <i>B*40:01_C*03:04_DRB4*01_DRB1*04:04_DQA1*03:01_DQB1*03:02</i> haplotype                       |            |     |     |               |     |     |             |      |            |     |     |               |               |     |      |      |      |       |
| Irrespective of haplotype                                                                                                                                                            | 1032       | 479 | 53  | 1164          | 739 | 83  | 0.77        | 2E-5 | 564        | 251 | 28  | 520           | 291           | 45  | 0.78 | 3E-3 | 0.77 | 2E-7  |
| Haplotype absent                                                                                                                                                                     | 1030       | 455 | 45  | 1162          | 681 | 71  | 0.78        | 8E-5 | 562        | 243 | 26  | 520           | 275           | 37  | 0.81 | 0.02 | 0.79 | 4E-6  |
| Haplotype present                                                                                                                                                                    | 2          | 24  | 8   | 2             | 58  | 12  | 1.25        | 0.6  | 2          | 8   | 2   | 0             | 16            | 8   | 0.28 | 0.1  | 0.88 | 0.7   |

Table S6 Cont.



| B<br>SNPs and <i>DRB1*04:04</i>                                                                                              | NGRC       |     |    |               |     |    |      |       | Replication |     |    |               |     |    |      |       | Meta Analysis |       |
|------------------------------------------------------------------------------------------------------------------------------|------------|-----|----|---------------|-----|----|------|-------|-------------|-----|----|---------------|-----|----|------|-------|---------------|-------|
|                                                                                                                              | N in Cases |     |    | N in Controls |     |    | OR   | P     | N in Cases  |     |    | N in Controls |     |    | OR   | P     | OR            | P     |
|                                                                                                                              | 0          | 1   | 2  | 0             | 1   | 2  |      |       | 0           | 1   | 2  | 0             | 1   | 2  |      |       |               |       |
| Test of association of <i>DRB1*04:04</i> with PD stratified by SNP genotype                                                  |            |     |    |               |     |    |      |       |             |     |    |               |     |    |      |       |               |       |
| Irrespective of SNP                                                                                                          | 1467       | 98  | 0  | 1795          | 189 | 2  | 0.64 | 5E-04 | 794         | 48  | 1  | 781           | 73  | 2  | 0.67 | 0.03  | 0.65          | 4E-05 |
| rs9268515_GG                                                                                                                 | 1104       | 17  | 0  | 1241          | 27  | 0  | 0.73 | 0.32  | 608         | 6   | 0  | 562           | 9   | 0  | 0.64 | 0.41  | 0.71          | 0.20  |
| rs9268515_GC                                                                                                                 | 336        | 66  | 0  | 508           | 138 | 0  | 0.72 | 0.05  | 145         | 31  | 1  | 166           | 51  | 1  | 0.70 | 0.15  | 0.71          | 0.01  |
| rs9268515_CC                                                                                                                 | 21         | 14  | 0  | 39            | 24  | 2  | 0.87 | 0.74  | 10          | 5   | 0  | 15            | 11  | 1  | 0.43 | 0.24  | 0.74          | 0.38  |
| rs77539933_CC/rs41269955_GG                                                                                                  | 1086       | 0   | 0  | 1269          | 0   | 0  |      |       | 325         | 0   | 0  | 273           | 0   | 0  |      |       |               |       |
| rs77539933_CT/rs41269955_GA                                                                                                  | 361        | 84  | 0  | 485           | 160 | 0  | 0.72 | 0.03  | 227         | 23  | 0  | 249           | 41  | 0  | 0.63 | 0.10  | 0.70          | 0.01  |
| rs77539933_TT/rs41269955_AA                                                                                                  | 17         | 14  | 0  | 34            | 29  | 2  | 0.86 | 0.72  | 64          | 12  | 1  | 64            | 20  | 1  | 0.69 | 0.32  | 0.76          | 0.33  |
| rs660895_AA                                                                                                                  | 1046       | 0   | 0  | 1230          | 0   | 0  |      |       | 593         | 0   | 0  | 550           | 0   | 0  |      |       |               |       |
| rs660895_AG                                                                                                                  | 395        | 81  | 0  | 520           | 158 | 0  | 0.69 | 0.01  | 181         | 41  | 0  | 212           | 60  | 0  | 0.81 | 0.36  | 0.72          | 0.01  |
| rs660895_GG                                                                                                                  | 26         | 17  | 0  | 45            | 31  | 2  | 0.77 | 0.49  | 20          | 7   | 1  | 19            | 13  | 2  | 0.65 | 0.36  | 0.72          | 0.27  |
| rs2395163_TT                                                                                                                 | 1022       | 10  | 0  | 1148          | 16  | 0  | 0.76 | 0.49  | 559         | 5   | 0  | 515           | 5   | 0  | 0.96 | 0.95  | 0.81          | 0.54  |
| rs2395163_TC                                                                                                                 | 411        | 68  | 0  | 594           | 145 | 0  | 0.70 | 0.03  | 212         | 38  | 1  | 234           | 56  | 1  | 0.80 | 0.32  | 0.73          | 0.02  |
| rs2395163_CC                                                                                                                 | 33         | 20  | 0  | 53            | 28  | 2  | 0.98 | 0.95  | 23          | 5   | 0  | 32            | 12  | 1  | 0.59 | 0.37  | 0.86          | 0.61  |
| Association of rs9268515_G vs. C allele with PD stratified by presence or absence of <i>DRB1*04:04</i>                       |            |     |    |               |     |    |      |       |             |     |    |               |     |    |      |       |               |       |
| Irrespective of haplotype                                                                                                    | 1121       | 402 | 35 | 1268          | 646 | 65 | 0.74 | 5E-06 | 614         | 177 | 15 | 571           | 218 | 27 | 0.75 | 5E-03 | 0.75          | 8E-08 |
| <i>DRB1*04:04</i> absent                                                                                                     | 1104       | 336 | 21 | 1241          | 508 | 39 | 0.77 | 3E-04 | 608         | 145 | 10 | 562           | 166 | 15 | 0.81 | 0.07  | 0.78          | 5E-05 |
| <i>DRB1*04:04</i> present                                                                                                    | 17         | 66  | 14 | 27            | 138 | 26 | 0.93 | 0.76  | 6           | 32  | 5  | 9             | 52  | 12 | 0.56 | 0.17  | 0.83          | 0.35  |
| Association of rs41269955_G vs. A / rs77539933_C vs. T allele with PD stratified by presence or absence of <i>DRB1*04:04</i> |            |     |    |               |     |    |      |       |             |     |    |               |     |    |      |       |               |       |
| Irrespective of haplotype                                                                                                    | 1086       | 445 | 31 | 1269          | 645 | 65 | 0.80 | 4E-04 | 325         | 250 | 77 | 273           | 290 | 85 | 0.82 | 0.02  | 0.81          | 2E-05 |
| <i>DRB1*04:04</i> absent                                                                                                     | 1086       | 361 | 17 | 1269          | 485 | 34 | 0.85 | 0.03  | 325         | 227 | 64 | 273           | 249 | 64 | 0.86 | 0.08  | 0.85          | 5E-03 |
| <i>DRB1*04:04</i> present                                                                                                    | 0          | 84  | 14 | 0             | 160 | 31 | 0.86 | 0.67  | 0           | 23  | 13 | 0             | 41  | 21 | 1.09 | 0.85  | 0.94          | 0.82  |
| Association of rs660895_A vs. G allele with PD stratified by presence or absence of <i>DRB1*04:04</i>                        |            |     |    |               |     |    |      |       |             |     |    |               |     |    |      |       |               |       |
| Irrespective of haplotype                                                                                                    | 1046       | 476 | 43 | 1230          | 678 | 78 | 0.83 | 2E-03 | 593         | 222 | 28 | 550           | 272 | 34 | 0.81 | 0.02  | 0.82          | 9E-05 |
| <i>DRB1*04:04</i> absent                                                                                                     | 1046       | 395 | 26 | 1230          | 520 | 45 | 0.88 | 0.06  | 593         | 181 | 20 | 550           | 212 | 19 | 0.85 | 0.11  | 0.87          | 0.01  |
| <i>DRB1*04:04</i> present                                                                                                    | 0          | 81  | 17 | 0             | 158 | 33 | 0.98 | 0.96  | 0           | 41  | 8  | 0             | 60  | 15 | 0.82 | 0.69  | 0.93          | 0.80  |
| Association of rs2395163_T vs. C allele with PD stratified by presence or absence of <i>DRB1*04:04</i>                       |            |     |    |               |     |    |      |       |             |     |    |               |     |    |      |       |               |       |
| Irrespective of haplotype                                                                                                    | 1032       | 479 | 53 | 1164          | 739 | 83 | 0.77 | 2E-05 | 564         | 251 | 28 | 520           | 291 | 45 | 0.78 | 3E-03 | 0.77          | 2E-07 |
| <i>DRB1*04:04</i> absent                                                                                                     | 1022       | 411 | 33 | 1148          | 594 | 53 | 0.79 | 4E-04 | 559         | 212 | 23 | 515           | 234 | 32 | 0.82 | 0.03  | 0.80          | 4E-05 |
| <i>DRB1*04:04</i> present                                                                                                    | 10         | 68  | 20 | 16            | 145 | 30 | 1.10 | 0.71  | 5           | 39  | 5  | 5             | 57  | 13 | 0.56 | 0.17  | 0.92          | 0.69  |

Table S6 Cont.

| C<br>SNPs and <i>C*03:04</i>                                                                                              | NGRC       |     |    |               |     |    |      |       | Replication |     |    |               |     |    |      |       | Meta Analysis |       |
|---------------------------------------------------------------------------------------------------------------------------|------------|-----|----|---------------|-----|----|------|-------|-------------|-----|----|---------------|-----|----|------|-------|---------------|-------|
|                                                                                                                           | N in Cases |     |    | N in Controls |     |    | OR   | P     | N in Cases  |     |    | N in Controls |     |    | OR   | P     | OR            | P     |
|                                                                                                                           | 0          | 1   | 2  | 0             | 1   | 2  |      |       | 0           | 1   | 2  | 0             | 1   | 2  |      |       |               |       |
| Test of association of <i>C*03:04</i> with PD stratified by SNP genotype                                                  |            |     |    |               |     |    |      |       |             |     |    |               |     |    |      |       |               |       |
| Irrespective of SNP                                                                                                       | 1354       | 202 | 9  | 1634          | 337 | 15 | 0.76 | 2E-03 | 748         | 92  | 3  | 707           | 142 | 7  | 0.63 | 6E-04 | 0.72          | 8E-06 |
| rs9268515_GG                                                                                                              | 1005       | 113 | 3  | 1121          | 143 | 4  | 0.90 | 0.39  | 558         | 55  | 1  | 503           | 65  | 3  | 0.75 | 0.12  | 0.85          | 0.11  |
| rs9268515_GC                                                                                                              | 319        | 80  | 3  | 465           | 175 | 6  | 0.70 | 0.01  | 147         | 28  | 2  | 154           | 60  | 4  | 0.54 | 0.01  | 0.65          | 5E-04 |
| rs9268515_CC                                                                                                              | 24         | 8   | 3  | 42            | 18  | 5  | 1.02 | 0.95  | 8           | 7   | 0  | 13            | 14  | 0  | 0.82 | 0.77  | 0.98          | 0.94  |
| rs77539933_CC/rs41269955_G<br>G                                                                                           | 975        | 109 | 2  | 1119          | 146 | 4  | 0.86 | 0.24  | 301         | 24  | 0  | 250           | 22  | 1  | 0.86 | 0.61  | 0.86          | 0.20  |
| rs77539933_CT/rs41269955_G<br>A                                                                                           | 353        | 86  | 6  | 467           | 170 | 8  | 0.74 | 0.03  | 217         | 32  | 1  | 234           | 55  | 1  | 0.67 | 0.09  | 0.72          | 0.01  |
| rs77539933_TT/rs41269955_AA                                                                                               | 23         | 7   | 1  | 43            | 19  | 3  | 0.80 | 0.61  | 61          | 15  | 1  | 67            | 16  | 2  | 1.04 | 0.91  | 0.94          | 0.81  |
| rs660895_AA                                                                                                               | 951        | 93  | 2  | 1089          | 136 | 5  | 0.78 | 0.07  | 545         | 47  | 1  | 480           | 66  | 4  | 0.62 | 0.01  | 0.72          | 3E-03 |
| rs660895_AG                                                                                                               | 368        | 103 | 5  | 494           | 177 | 7  | 0.83 | 0.15  | 183         | 37  | 2  | 204           | 65  | 3  | 0.67 | 0.06  | 0.78          | 0.03  |
| rs660895_GG                                                                                                               | 35         | 6   | 2  | 51            | 24  | 3  | 0.57 | 0.16  | 20          | 8   | 0  | 23            | 11  | 0  | 1.03 | 0.96  | 0.69          | 0.26  |
| rs2395163_TT                                                                                                              | 924        | 105 | 3  | 1025          | 135 | 4  | 0.87 | 0.29  | 513         | 50  | 1  | 455           | 62  | 3  | 0.70 | 0.06  | 0.81          | 0.05  |
| rs2395163_TC                                                                                                              | 391        | 85  | 3  | 551           | 182 | 6  | 0.72 | 0.02  | 214         | 36  | 1  | 222           | 66  | 3  | 0.58 | 0.01  | 0.68          | 9E-04 |
| rs2395163_CC                                                                                                              | 38         | 12  | 3  | 58            | 20  | 5  | 0.97 | 0.93  | 21          | 6   | 1  | 30            | 14  | 1  | 0.90 | 0.83  | 0.95          | 0.85  |
| Association of rs9268515_G vs. C allele with PD stratified by presence or absence of <i>C*03:04</i>                       |            |     |    |               |     |    |      |       |             |     |    |               |     |    |      |       |               |       |
| Irrespective of haplotype                                                                                                 | 1121       | 402 | 35 | 1268          | 646 | 65 | 0.74 | 5E-06 | 614         | 177 | 15 | 571           | 218 | 27 | 0.75 | 5E-03 | 0.75          | 8E-08 |
| <i>C*03:04</i> absent                                                                                                     | 1005       | 319 | 24 | 1121          | 465 | 42 | 0.79 | 2E-03 | 558         | 147 | 8  | 503           | 154 | 13 | 0.84 | 0.13  | 0.81          | 5E-04 |
| <i>C*03:04</i> present                                                                                                    | 116        | 83  | 11 | 147           | 181 | 23 | 0.66 | 6E-03 | 56          | 30  | 7  | 68            | 64  | 14 | 0.70 | 0.09  | 0.67          | 1E-03 |
| Association of rs41269955_G vs. A / rs77539933_C vs. T allele with PD stratified by presence or absence of <i>C*03:04</i> |            |     |    |               |     |    |      |       |             |     |    |               |     |    |      |       |               |       |
| Irrespective of haplotype                                                                                                 | 1086       | 445 | 31 | 1269          | 645 | 65 | 0.80 | 4E-04 | 325         | 250 | 77 | 273           | 290 | 85 | 0.82 | 0.02  | 0.81          | 2E-05 |
| <i>C*03:04</i> absent                                                                                                     | 975        | 353 | 23 | 1119          | 467 | 43 | 0.85 | 0.02  | 301         | 217 | 61 | 250           | 234 | 67 | 0.83 | 0.04  | 0.84          | 2E-03 |
| <i>C*03:04</i> present                                                                                                    | 111        | 92  | 8  | 150           | 178 | 22 | 0.71 | 0.02  | 24          | 33  | 16 | 23            | 56  | 18 | 0.89 | 0.63  | 0.76          | 0.03  |
| Association of rs660895_A vs. G allele with PD stratified by presence or absence of <i>C*03:04</i>                        |            |     |    |               |     |    |      |       |             |     |    |               |     |    |      |       |               |       |
| Irrespective of haplotype                                                                                                 | 1046       | 476 | 43 | 1230          | 678 | 78 | 0.83 | 2E-03 | 593         | 222 | 28 | 550           | 272 | 34 | 0.81 | 0.02  | 0.82          | 9E-05 |
| <i>C*03:04</i> absent                                                                                                     | 951        | 368 | 35 | 1089          | 494 | 51 | 0.87 | 0.04  | 545         | 183 | 20 | 480           | 204 | 23 | 0.82 | 0.05  | 0.85          | 0.01  |
| <i>C*03:04</i> present                                                                                                    | 95         | 108 | 8  | 141           | 184 | 27 | 0.78 | 0.10  | 48          | 39  | 8  | 70            | 68  | 11 | 0.96 | 0.87  | 0.84          | 0.15  |
| Association of rs2395163_T vs. C allele with PD stratified by presence or absence of <i>C*03:04</i>                       |            |     |    |               |     |    |      |       |             |     |    |               |     |    |      |       |               |       |
| Irrespective of haplotype                                                                                                 | 1032       | 479 | 53 | 1164          | 739 | 83 | 0.77 | 2E-05 | 564         | 251 | 28 | 520           | 291 | 45 | 0.78 | 3E-03 | 0.77          | 2E-07 |
| <i>C*03:04</i> absent                                                                                                     | 924        | 391 | 38 | 1025          | 551 | 58 | 0.80 | 1E-03 | 513         | 214 | 21 | 455           | 222 | 30 | 0.82 | 0.04  | 0.81          | 1E-04 |
| <i>C*03:04</i> present                                                                                                    | 108        | 88  | 15 | 139           | 188 | 25 | 0.73 | 0.03  | 51          | 37  | 7  | 65            | 69  | 15 | 0.75 | 0.16  | 0.74          | 0.01  |

The 0, 1, 2 sub-header under case and control columns denote the number of subjects with 0, 1 or 2 copies of SNP minor allele or the haplotype, whichever is being tested. Association tests were done under an additive model, thus the OR represents the change in risk for each added copy of SNP minor allele or haplotype. SNP frequencies were high enough to stratify by 3 genotypes. Haplotypes were not common; hence they were stratified as being present (1 or 2 copies) or absent (0 copy). Two individuals had imputed haplotypes but did not have the SNP genotype; they appear in unstratified haplotype tests only. We did not calculate OR and P if a class had  $N < 5$ .



Table S8. eQTL data: Association of PD-associated SNPs with expression of genes in the *HLA*-region (Extended version of Table 6 of main text.)

| SNP             | Gene        | P               | Probe                                                | Specificity                                                            | Browser                | Source                                        | Method                                        | Population                 | Tissue                |
|-----------------|-------------|-----------------|------------------------------------------------------|------------------------------------------------------------------------|------------------------|-----------------------------------------------|-----------------------------------------------|----------------------------|-----------------------|
| rs3129882       | <i>DRA</i>  | 1E-5<br>7E-4    | ILMN_2157441                                         | unique                                                                 | Genevar                | Nica <sup>23</sup>                            | Illumina whole genome expression HumHT-12v3   | MuTHER twins UK Cauc       | Lymphoblasts          |
|                 | <i>DRA</i>  | 4E-5            | --                                                   | unique                                                                 | eqtl                   | Montgomery <sup>24</sup>                      | RNA-Seq                                       | HapMap CEU                 | Lymphoblasts          |
|                 | <i>DRB5</i> | 9E-5            | --                                                   | unique                                                                 | eqtl                   | Montgomery <sup>24</sup>                      | RNA-Seq                                       | HapMap CEU                 | Lymphoblasts          |
|                 | <i>DQB1</i> | 3E-14           | Probe cluster                                        | unique                                                                 | SCAN                   | Gamazon <sup>25</sup>                         | Affymetrix Human Exon 1.0 ST Array            | HapMap CEU                 | Lymphoblasts          |
|                 | <i>DQA2</i> | 2E-7            | GI_11095446-S                                        | 100% <i>DQA2</i> , 88% <i>DQA1</i>                                     | eqtl                   | Stranger <sup>26</sup>                        | Illumina Sentrix Hum-6 Expression BeadChip v1 | HapMaP mixed 4 populations | Lymphoblasts          |
|                 | <i>DRB5</i> | 9E-9            | ILMN_1697499                                         | 100% <i>DRB5</i> , 92% <i>DRB1</i> , 88% <i>DRB3</i>                   | Genevar                | Stranger <sup>29</sup>                        | Illumina Sentrix Hum-6 Expression BeadChip v2 | HapMap CEU                 | Lymphoblasts          |
|                 | <i>DRB5</i> | 4E-5<br>9E-5    | ILMN_1697499                                         | 100% <i>DRB5</i> , 92% <i>DRB1</i> , 88% <i>DRB3</i>                   | Genevar                | Dimas <sup>30</sup>                           | Illumina Human WG-6 v3                        | Western European           | Lymphoblasts, T cells |
|                 | <i>DQB2</i> | 3E-14           | Probe cluster                                        | Unknown                                                                | SCAN                   | Gamazon <sup>25</sup>                         | Affymetrix Human Exon 1.0 ST Array            | HapMap CEU                 | Lymphoblasts          |
|                 | <i>DRB1</i> | 3E-14           | Probe cluster                                        | Unknown                                                                | SCAN                   | Gamazon <sup>25</sup>                         | Affymetrix Human Exon 1.0 ST Array            | HapMap CEU                 | Lymphoblasts          |
| <i>DRB3,4,5</i> | 3E-14       | Probe cluster   | Unknown                                              | SCAN                                                                   | Gamazon <sup>25</sup>  | Affymetrix Human Exon 1.0 ST Array            | HapMap CEU                                    | Lymphoblasts               |                       |
| rs2395163       | <i>DQA1</i> | 5E-14,<br>5E-13 | ILMN_1791534                                         | unique                                                                 | Genevar                | Nica <sup>23</sup>                            | Illumina whole genome expression HumHT-12v3   | MuTHER twins UK Cauc       | Lymphoblasts          |
|                 | <i>DQA2</i> | 1E-6            | --                                                   | unique                                                                 | eqtl                   | Montgomery <sup>24</sup>                      | RNA-Seq                                       | HapMap CEU                 | Lymphoblasts          |
|                 | <i>DRB1</i> | 5E-16           | ILMN_1715169                                         | 100% <i>DRB1</i> , 94% <i>DRB4</i> , 92% <i>DRB5</i> , 82% <i>DRB3</i> | eqtl                   | Zeller <sup>27</sup>                          | Illumina whole genome expression HumHT-12v3   | German                     | Monocytes             |
|                 | <i>DQA1</i> | 2E-79           | ILMN_1808405                                         | 100% <i>DQA1</i> , 98% <i>DQA2</i> , 74% <i>DOA</i>                    | eqtl                   | Zeller <sup>27</sup>                          | Illumina whole genome expression HumHT-12v3   | German                     | Monocytes             |
|                 | <i>DQA1</i> | 6E-6            | GI_18426974-S                                        | 100% <i>DQA1</i> , 94% <i>DQA2</i>                                     | eqtl                   | Veyrieras <sup>28</sup>                       | Illumina Sentrix Hum-6 Expression BeadChip v1 | HapMaP mixed 4 populations | Lymphoblasts          |
|                 | <i>DQA2</i> | 9E-15           | GI_11095446-S                                        | 100% <i>DQA2</i> , 88% <i>DQA1</i>                                     | eqtl                   | Stranger <sup>26</sup>                        | Illumina Sentrix Hum-6 Expression BeadChip v1 | HapMaP mixed 4 populations | Lymphoblasts          |
|                 | <i>DQB1</i> | 2E-30           | ILMN_1661266                                         | 100% <i>DQB1</i> , 86% <i>DQB2</i> , 74% <i>DRB5</i>                   | eqtl                   | Zeller <sup>27</sup>                          | Illumina whole genome expression HumHT-12v3   | German                     | Monocytes             |
|                 | <i>DRB5</i> | 1E-14           | ILMN_1697499                                         | 100% <i>DRB5</i> , 92% <i>DRB1</i> , 88% <i>DRB3</i>                   | eqtl                   | Zeller <sup>27</sup>                          | Illumina whole genome expression HumHT-12v3   | German                     | Monocytes             |
| <i>DRB5</i>     | 3E-6        | ILMN_1697499    | 100% <i>DRB5</i> , 92% <i>DRB1</i> , 88% <i>DRB3</i> | Genevar                                                                | Stranger <sup>29</sup> | Illumina Sentrix Hum-6 Expression BeadChip v2 | HapMap CEU                                    | Lymphoblasts               |                       |
| rs660895        | <i>DQA1</i> | 2E-17<br>1E-13  | ILMN_1791534                                         | unique                                                                 | Genevar                | Nica <sup>23</sup>                            | Illumina whole genome expression HumHT-12v3   | MuTHER twins UK Cauc       | Lymphoblasts          |
|                 | <i>DQA2</i> | 6E-7            | --                                                   | unique                                                                 | eqtl                   | Montgomery <sup>24</sup>                      | RNA-Seq                                       | HapMap CEU                 | Lymphoblasts          |
|                 | <i>AIF1</i> | 3E-5            | ILMN_1792473                                         | unique                                                                 | Genevar                | Grundberg <sup>31</sup>                       | Illumina whole genome expression HumHT-12v3   | MuTHER twins UK Cauc       | Lymphoblasts          |
|                 | <i>DQA1</i> | 6E-11           | GI_18426974-S                                        | 100% <i>DQA1</i> , 94% <i>DQA2</i>                                     | eqtl                   | Veyrieras <sup>28</sup>                       | Illumina Sentrix Hum-6 Expression BeadChip v1 | HapMaP mixed               | Lymphoblasts          |
|                 | <i>DQA2</i> | 1E-21           | GI_11095446-S                                        | 100% <i>DQA2</i> , 88% <i>DQA1</i>                                     | eqtl                   | Stranger <sup>26</sup>                        | Illumina Sentrix Hum-6 Expression BeadChip v1 | HapMaP mixed 4 populations | Lymphoblasts          |
|                 | <i>DRB5</i> | 4E-7            | ILMN_1697499                                         | 100% <i>DRB5</i> , 92% <i>DRB1</i> , 88% <i>DRB3</i>                   | Genevar                | Stranger <sup>29</sup>                        | Illumina Sentrix Hum-6 Expression BeadChip v2 | HapMap CEU                 | Lymphoblasts          |

Each PD-associated SNP was tested for association with expression of genes within 1 Mb of the SNP using three publically available databases (Browser). SNP-gene associations that passed Bonferroni-corrected significance (P) are shown. Rows that have two P values denote independent confirmation in co-twins or in two different tissues. We went back to the original data (Source column),

identified the probe that was used (Probe column) and determined specificity of each probe to the identified gene and its allelic variants. Specificity denotes if the probe hybridized with only one gene or with multiple genes. Unique denotes when probe hybridized with one gene only with 100% sequence match. % denotes the nucleotide match between the probe (usually 50 nucleotides) and the targeted sequences. Except in one case, the probes were against a functionally non-polymorphic gene (ex. *DRA*) or the 3'UTR and therefore allele-specificity was not of relevance. In the one exception (see rs2395163, *DQB1*, Zeller, 2010<sup>27</sup>) where the probe mapped to exon 4, it was a 100% match to all *DQB1\*02* alleles, 98% to *DQB1\*03* and *DQB1\*04* alleles, 82%-92% to *DQB1\*06* alleles, and 82%-88% to *DQB1\*05* alleles.
